# Supplementary material
Source: bioRxiv or medRxiv preprint supplement (https://www.medrxiv.org/highwire/filestream/72238/field_highwire_adjunct_files/0/2020.02.17.20023721-1.pdf)

## **Supplementary Material**

### **Case Clinical Information**

On January 17, 2020, a 78-year-old man, who came to visit his daughter together his wife from Wuhan six days ago, presented to the outpatient clinic at our hospital in Zhuhai, Guangdong Province, China, with 7-day cough and fever. He was admitted to the negative pressure isolation room in the Department of Infectious Diseases at our hospital as a suspected case of SARS-CoV-2 infection. On admission, the physical examination revealed a body temperature of 37.5°C, blood pressure of 105/56 mmHg, pulse of 67 beats per minute and respiratory rate of 22 breaths per minute with oxygen saturation of 97%. On physical examination, auscultation revealed rhonchi and cracks on bilateral lungs. Initial arterial blood gas analysis showed the arterial partial pressure of oxygen ( $\text{PaO}_2$ ) / fraction of inspiration oxygen ( $\text{FiO}_2$ ) was 176. Nasopharyngeal and oropharyngeal swab specimens tested positive by real-time reverse transcriptase polymerase chain reaction (rRT-PCR) for SARS-CoV-2. Chest CT presented with multiple ground-glass opacities, coinciding with previous report<sup>1,2</sup>, showing evidence of pneumonia in both left and right lungs. His wife and daughter tested positive for SARS-CoV-2 RNA and admitted to the hospital on January 18, 2020.

On hospital days 1 through 3, the patient remained fever with stable vital signs. The oxygen saturation remained above 95% with high-flow oxygen therapy. Empiric antimicrobials with oseltamivir and moxifloxacin was given during this period of time.

On hospital day 4, the patient developed severe respiratory distress with the PaO<sub>2</sub>/FiO<sub>2</sub> decreasing to 130 and was immediately transferred to the intensive care unit receiving an intubation and mechanical ventilation. Along with sedation, prone position mechanical ventilation was applied for 12 hours per day and low tidal volume was set. The PaO<sub>2</sub>/FiO<sub>2</sub> increased to 350 immediately after intubation, but decreased gradually again in the following several days to the lowest level of 70 at 10 days after admission. Meanwhile, the chest X-ray showed extensive bilateral consolidation. And the emergent veno-venous extracorporeal membrane oxygenation (VV-ECMO) was applied at the same day. On day 10, coffee ground gastric contents were observed from the gastric drainage tube and fecal occult blood tested positive, indicating upper gastrointestinal bleed. Gastrointestinal endoscopy was performed to determine the exact location of bleeding. Mucosa damage in esophagus was observed under endoscopy. Biopsy samples were taken from esophagus, gastric, duodenum and colon for histopathological and immunofluorescent staining. 1 day after treatment with octreotide and esomeprazole, gastrointestinal bleeding stopped. As of February 12, 2020, the patient remained hospitalized. The vital signs are stable with mechanical ventilation, V-V ECMO, and low dose vasopressors. There is no obvious evidence of other organs dysfunction.

## **Methods**

### **Histopathological and Immunofluorescent Staining**

Esophageal, gastric, duodenal and rectal tissues were obtained using endoscopy on day 10. Samples were embedded with Paraffin and then stained with hematoxylin and

eosin. For immunofluorescent staining, 3 µm-thick sections were dewaxed in xylene, rehydrated in alcohol, and washed in distilled water 3 times before microwave repair. Following washing three times in phosphate-buffered saline with Tween (PBST), sections were incubated with 10% goat serum in PBST for 1 h at room temperature and then incubated overnight at 4°C with primary antibodies (anti-ACE2, Sino Biological, 10108-T56, 1:500; anti-NP, Sino Biological, 40143-T62, 1:500). The slides were incubated with secondary antibodies (Alexa Fluor®647-conjugated goat anti-rabbit IgG, bs-0296G-AF647, Bioss, 1:100) for 1 h at room temperature followed by washing three times with PBST. Nuclei were then counterstained with 4', 6-diamidino-2-phenylindole (DAPI) after washing three times with PBST. Slides were imaged using a laser scanning confocal microscopy (LSM880, Carl Zeiss MicroImaging).

## **Results**

### **Detection of 2019-nCoV RNA in the patient undergoing gastrointestinal Endoscopy**

The respiratory specimens from the case tested positive by rRT-PCR for 2019-nCoV on day 1 and remained positive on day 26 (Table 1). The stool started test positive on day 9 and remained positive on 26 (Table 1). The serum and urine tested positive transiently on day 11 and day 16 (Table 1).

### **Endoscopic image**

Multiple round white-covered lesions in diameter 4-6 mm were seen on esophagus in

a range of between 26 cm from the incisor teeth and esophagogastric junction (Supplementary Figure 1A). Fusion of the mucosal lesions and mucosal bleeding were seen. Abnormality was not observed in the gastric, duodenum, colon and rectum (Supplementary Figure 1B through 1D).

## **References**

1. Kanne JP. Chest CT Findings in 2019 Novel Coronavirus (2019-nCoV) Infections from Wuhan, China: Key Points for the Radiologist. *Radiology* 2020:200241.
2. Huang C, Wang Y, Li X, et al. Clinical features of patients infected with 2019 novel coronavirus in Wuhan, China. *Lancet* 2020.

**Supplementary Table 1. Time line of detection of nCoV-2019 in different specimens of the SARS-CoV-2-patient.**

| Specimen                     | Day 1 | Day 2    | Day 3    | Day 5    | Day 7    | Day 9    | Day 10   | Day 11   | Day 13   | Day 14   | Day 16   | Day 18   | Day 20   | Day 21   | Day 22   | Day 24   | Day 26   |
|------------------------------|-------|----------|----------|----------|----------|----------|----------|----------|----------|----------|----------|----------|----------|----------|----------|----------|----------|
| <b>Respiratory specimens</b> | NT    | Positive | Positive | Positive | Positive | Positive | Positive | Positive | Positive | Positive | Positive | Positive | Positive | Positive | Positive | Positive | Positive |
| <b>Stool</b>                 | NT    | NT       | Negative | Negative | Negative | Positive | Positive | Positive | Positive | Positive | Positive | NT       | Positive | Positive | Positive | Positive | Positive |
| <b>Serum</b>                 | NT    | NT       | Negative | Negative | Negative | Negative | Negative | Positive | Negative | Negative | Negative | NT       | NT       | NT       | Negative | NT       | Negative |
| <b>Urine</b>                 | NT    | NT       | Negative | Negative | Negative | Negative | Negative | NT       | Negative | NT       | Positive | NT       | NT       | NT       | NT       | NT       | NT       |
| <b>Esophagus</b>             | NT    | NT       | NT       | NT       | NT       | NT       | Positive | NT       | NT       | NT       | NT       | NT       | NT       | NT       | NT       | NT       | NT       |
| <b>Stomach</b>               | NT    | NT       | NT       | NT       | NT       | NT       | Positive | NT       | NT       | NT       | NT       | NT       | NT       | NT       | NT       | NT       | NT       |
| <b>Duodenum</b>              | NT    | NT       | NT       | NT       | NT       | NT       | Positive | NT       | NT       | NT       | NT       | NT       | NT       | NT       | NT       | NT       | NT       |
| <b>Rectum</b>                | NT    | NT       | NT       | NT       | NT       | NT       | Positive | NT       | NT       | NT       | NT       | NT       | NT       | NT       | NT       | NT       | NT       |

NT denotes not tested.

**Supplementary Figure 1. Gastrointestinal Endoscopy Overview Images.**

Shown are gastrointestinal endoscopy overview images of esophagus (A-B), stomach (C) and duodenum (D) on day 10.

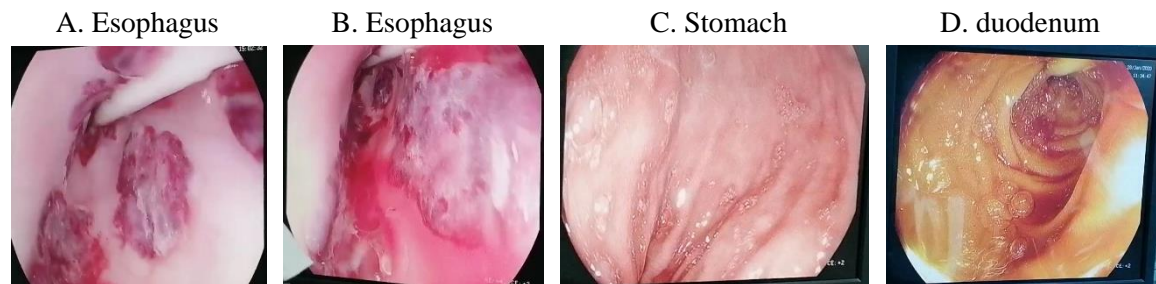

Supplement: Supplementary file [file 2020.02.17.20023721-1.pdf]
